# Supplementary material
Source: PubMed Central journal article supplement (PMC10339359)
Supplement: NIHMS1904091-supplement-1.pdf [file NIHMS1904091-supplement-1.pdf]

## Supplemental Information

## Supplementary Tables

## Supplementary Table 1

Frequency and types of BRCA mutations in the rucaparib-arm exceptional benefit and short-term subgroups.

|                                                                                                             | BRCA-mutant exceptional benefit subgroup (n=46) | BRCA-mutant short-term subgroup (n=12) | <i>p</i> value     | Odds ratio (95% CI) |
|-------------------------------------------------------------------------------------------------------------|-------------------------------------------------|----------------------------------------|--------------------|---------------------|
| Gene                                                                                                        |                                                 |                                        | 0.106 <sup>a</sup> |                     |
| <i>BRCA1</i>                                                                                                | 21 (45.7)                                       | 9 (75.0)                               |                    | 0.3 (0.1–1.1)       |
| <i>BRCA2</i>                                                                                                | 25 (54.3)                                       | 3 (25.0)                               |                    | 3.6 (0.9–13.2)      |
| Germline/somatic status                                                                                     |                                                 |                                        | 0.408 <sup>b</sup> |                     |
| Germline                                                                                                    | 22 (47.8)                                       | 7 (58.3)                               |                    | 0.7 (0.2–2.4)       |
| Somatic                                                                                                     | 18 (39.1)                                       | 5 (41.7)                               |                    | 0.9 (0.2–3.1)       |
| Unknown                                                                                                     | 6 (13.0)                                        | 0                                      |                    | NA                  |
| Mutation type                                                                                               |                                                 |                                        | >0.99 <sup>a</sup> |                     |
| Short variant                                                                                               | 41 (89.1)                                       | 11 (91.7)                              |                    | 0.7 (0.1–5.3)       |
| Rearrangement/loss                                                                                          | 5 (10.9)                                        | 1 (8.3)                                |                    | 1.3 (0.2–17.1)      |
| BRCA, <i>BRCA1</i> or <i>BRCA2</i> ; mut, mutated; NA, not applicable.                                      |                                                 |                                        |                    |                     |
| Data are n (%). Data for the placebo arm are available in Supplementary Table 3.                            |                                                 |                                        |                    |                     |
| <sup>a</sup> Significance based on Fisher's exact test. <sup>b</sup> Significance based on chi-square test. |                                                 |                                        |                    |                     |

**Supplementary Table 2**

Genetic and epigenetic alterations in the placebo-arm exceptional benefit and short-term subgroups.

| Alteration                                                                                                                                                                                                                                                                                          | Exceptional benefit subgroup<br>(n=4) | Short-term subgroup (n=62) | p value | Odds ratio<br>(95% CI) |
|-----------------------------------------------------------------------------------------------------------------------------------------------------------------------------------------------------------------------------------------------------------------------------------------------------|---------------------------------------|----------------------------|---------|------------------------|
| BRCA mutant                                                                                                                                                                                                                                                                                         | 3 (75.0)                              | 26 (41.9)                  | 0.312   | 4.2 (0.6–55.2)         |
| BRCA wild-type + <i>RAD51C/D</i> mutation                                                                                                                                                                                                                                                           | 0                                     | 0                          | NA      | NA                     |
| BRCA wild-type + other HRR gene mutation                                                                                                                                                                                                                                                            | 0                                     | 2 (3.2)                    | >0.99   | NA                     |
| BRCA wild-type + LOH high                                                                                                                                                                                                                                                                           | 0                                     | 14 (22.6)                  | 0.571   | NA                     |
| BRCA wild-type + LOH low                                                                                                                                                                                                                                                                            | 1 (25.0)                              | 15 (24.2)                  | >0.99   | 1.0 (0.1–7.5)          |
| BRCA wild-type + high <i>BRCA1</i> methylation                                                                                                                                                                                                                                                      | 0/1                                   | 5/29 (17.2)                | >0.99   | NA                     |
| BRCA, <i>BRCA1</i> or <i>BRCA2</i> ; HRR, homologous recombination repair; LOH, loss of heterozygosity; NA, not applicable.<br>Statistical comparisons based on Fisher's exact test for all cases. Data are n (%) or n/N (%). Data for the rucaparib arm are available in Table 2 in the main text. |                                       |                            |         |                        |

**Supplementary Table 3**

Frequency and types of BRCA mutations in the placebo-arm exceptional benefit and short-term subgroups.

|                                                                                    | <b>BRCA-mutant exceptional benefit subgroup<br/>(n=3)</b> | <b>BRCA-mutant short-term subgroup<br/>(n=26)</b> | <b>p value</b>      | <b>Odds ratio<br/>(95% CI)</b> |
|------------------------------------------------------------------------------------|-----------------------------------------------------------|---------------------------------------------------|---------------------|--------------------------------|
| Gene                                                                               |                                                           |                                                   | >0.99 <sup>a</sup>  |                                |
| <i>BRCA1</i>                                                                       | 2 (66.7)                                                  | 17 (65.4)                                         |                     | 1.1 (0.1–16.9)                 |
| <i>BRCA2</i>                                                                       | 1 (33.3)                                                  | 9 (34.6)                                          |                     | 0.9 (0.1–9.0)                  |
| Germline/somatic status                                                            |                                                           |                                                   | 0.8731 <sup>b</sup> |                                |
| Germline                                                                           | 2 (66.7)                                                  | 17 (65.4)                                         |                     | 1.1 (0.1–16.9)                 |
| Somatic                                                                            | 1 (33.3)                                                  | 7 (26.9)                                          |                     | 1.4 (0.1–13.0)                 |
| Unknown                                                                            | 0                                                         | 2 (7.7)                                           |                     | NA                             |
| Mutation type                                                                      |                                                           |                                                   | >0.99 <sup>a</sup>  |                                |
| Short variant                                                                      | 3 (100)                                                   | 23 (88.5)                                         |                     | NA                             |
| Rearrangement/loss                                                                 | 0                                                         | 3 (11.5)                                          |                     | NA                             |
| BRCA, <i>BRCA1</i> or <i>BRCA2</i> ; mut, mutated; NA, not applicable.             |                                                           |                                                   |                     |                                |
| Data are n (%). Data for the rucaparib arm are available in Supplementary Table 1. |                                                           |                                                   |                     |                                |
| <sup>a</sup> Significance based on Fisher's exact test.                            |                                                           |                                                   |                     |                                |
| <sup>b</sup> Significance based on chi-square test.                                |                                                           |                                                   |                     |                                |

**Supplementary Table 4**

Non-BRCA HRR gene mutations detected in the BRCA wild-type rucaparib-arm exceptional benefit and short-term subgroups.

| Patient number                                                                                                                                                                                                                                                                | PFS (months) | Gene          | Mutation                  | Germline/somatic status | Zygoty       |
|-------------------------------------------------------------------------------------------------------------------------------------------------------------------------------------------------------------------------------------------------------------------------------|--------------|---------------|---------------------------|-------------------------|--------------|
| Exceptional benefit subgroup                                                                                                                                                                                                                                                  |              |               |                           |                         |              |
| 1                                                                                                                                                                                                                                                                             | 46.7+        | <i>RAD51C</i> | Splice site 572-1G>A      | Somatic                 | Homozygous   |
| 2                                                                                                                                                                                                                                                                             | 38.6+        | <i>RAD51C</i> | Splice site 706-2A>G      | Germline                | Homozygous   |
| 3                                                                                                                                                                                                                                                                             | 35.5+        | <i>RAD51C</i> | Splice site 706-2A>G      | NA                      | Homozygous   |
| 4                                                                                                                                                                                                                                                                             | 27.4+        | <i>RAD51C</i> | R193*                     | Germline                | Homozygous   |
| 5                                                                                                                                                                                                                                                                             | 54.3+        | <i>RAD51D</i> | R120*                     | Germline                | Homozygous   |
| 6                                                                                                                                                                                                                                                                             | 50.2+        | <i>RAD51D</i> | R74*                      | Somatic                 | Homozygous   |
| 7                                                                                                                                                                                                                                                                             | 24.2         | <i>FANCC</i>  | Truncating rearrangement  | NA                      | NA           |
| Short-term subgroup                                                                                                                                                                                                                                                           |              |               |                           |                         |              |
| 8                                                                                                                                                                                                                                                                             | 2.9          | <i>ATM</i>    | R2832C                    | Germline                | NA           |
|                                                                                                                                                                                                                                                                               |              | <i>FANCM</i>  | L691fs*5                  | NA                      | NA           |
| 9 <sup>a</sup>                                                                                                                                                                                                                                                                | 9.0          | <i>FANCA</i>  | Duplication rearrangement | NA                      | NA           |
| 10                                                                                                                                                                                                                                                                            | 2.6          | <i>FANCD2</i> | W1450*                    | NA                      | Heterozygous |
| 11                                                                                                                                                                                                                                                                            | 2.7          | <i>RAD54L</i> | H676fs*19                 | NA                      | Heterozygous |
| 12                                                                                                                                                                                                                                                                            | 2.7          | <i>ATR</i>    | A1266fs*8                 | NA                      | Heterozygous |
| BRCA, <i>BRCA1</i> or <i>BRCA2</i> ; HRR, homologous recombination repair; NA, not available; PFS, progression-free survival.                                                                                                                                                 |              |               |                           |                         |              |
| <sup>a</sup> This patient received rucaparib for 2 weeks then discontinued treatment but was included in the short-term subgroup as they had disease progression on their first scan, which was performed at 9 months after the first dose of rucaparib (protocol deviation). |              |               |                           |                         |              |

**Supplementary Table 5**

Multivariate logistic regression model analysis of maximum likelihood estimates.

| Parameter                      | Level                      | DF | Estimate | Standard error | Wald chi-square | Probability > chi-square |
|--------------------------------|----------------------------|----|----------|----------------|-----------------|--------------------------|
| Intercept                      |                            | 1  | -2.930   | 0.334          | 77.187          | <0.0001                  |
| Treatment arm                  | Rucaparib                  | 1  | 1.313    | 0.264          | 24.757          | <0.0001                  |
| PPFI                           | >12 month                  | 1  | 0.352    | 0.141          | 6.193           | 0.013                    |
| Measurable disease at baseline | No                         | 1  | 0.237    | 0.144          | 2.724           | 0.099                    |
| Molecular characteristic       | BRCA mutant                | 1  | 0.690    | 0.271          | 6.475           | 0.011                    |
|                                | BRCA wild-type/LOH high    | 1  | -0.316   | 0.346          | 0.837           | 0.360                    |
|                                | BRCA wild-type/LOH unknown | 1  | 0.177    | 0.444          | 0.159           | 0.690                    |
|                                | <i>RAD51C/D</i> mutation   | 1  | 1.817    | 0.558          | 10.594          | 0.001                    |
|                                | Other HRR gene mutation    | 1  | -1.460   | 0.872          | 2.801           | 0.094                    |

BRCA, *BRCA1* or *BRCA2*; DF, degrees of freedom; ECOG PS, Eastern Cooperative Oncology Group performance status; HRR, homologous recombination repair; LOH, loss of heterozygosity; PPFI, penultimate platinum-free interval.

The following baseline characteristics were included in the model, only those that were identified as significant predictors are shown in the table: age, body mass index, race (White vs other or missing), ECOG PS, type of ovarian cancer, number of prior chemotherapy regimens, number of prior platinum-based chemotherapy regimens, measurable disease at baseline, stratification variables of penultimate platinum-free interval and best response to last chemotherapy treatment, and molecular classifications based on HRD-based molecular status (BRCA mutant, BRCA wild-type/high LOH, BRCA wild-type/low LOH, BRCA wild-type/unknown LOH), mutations in the *RAD51C* or *RAD51D* genes, mutations in other homologous-recombination-repair genes, and archival methylation status in BRCA-wild-type patients (high methylation, low methylation, unmethylated, or not available). Race was also identified as a borderline significant factor ( $p=0.114$ ).

**Supplementary Table 6**

Odds ratio estimates for variables identified as significant predictors by multivariate logistics regression model comparing exceptional benefit patients to all remaining patients enrolled in ARIEL3.

| <b>Effect</b>                  | <b>Comparison</b>                                        | <b>Point estimate</b> | <b>95% Wald Confidence Limit</b> |
|--------------------------------|----------------------------------------------------------|-----------------------|----------------------------------|
| Treatment arm                  | Rucaparib versus placebo                                 | 13.823                | 4.913–38.897                     |
| PPFI                           | >12 months versus 6–12 months                            | 2.021                 | 1.161–3.518                      |
| Measurable disease at baseline | No versus yes                                            | 1.606                 | 0.915–2.820                      |
| Molecular characteristic       | BRCA mutant versus BRCA wild-type/LOH low                | 4.944                 | 2.286–10.691                     |
|                                | BRCA wild-type/LOH high versus BRCA wild-type/LOH low    | 1.807                 | 0.717–4.557                      |
|                                | BRCA wild-type/LOH unknown versus BRCA wild-type/LOH low | 2.96                  | 0.941–9.316                      |
|                                | <i>RAD51C/D</i> mutation versus BRCA wild-type/LOH low   | 15.256                | 3.74–62.237                      |
|                                | Other HRR gene mutation versus BRCA wild-type/LOH low    | 0.576                 | 0.068–4.858                      |

BRCA, *BRCA1* or *BRCA2*; DF, degrees of freedom; HRR, homologous recombination repair; LOH, loss of heterozygosity; PPFI, penultimate platinum-free interval.

**Supplementary Table 7**

Summary of TEAEs in the overall ARIEL3 safety population and the exceptional benefit subgroup.

| TEAEs, n (%)                                                                                                                                                                                               | Rucaparib arm                          |                                 | Placebo arm                           |                                 |
|------------------------------------------------------------------------------------------------------------------------------------------------------------------------------------------------------------|----------------------------------------|---------------------------------|---------------------------------------|---------------------------------|
|                                                                                                                                                                                                            | Exceptional benefit subgroup<br>(n=79) | Overall <sup>a</sup><br>(N=372) | Exceptional benefit subgroup<br>(n=4) | Overall <sup>a</sup><br>(N=189) |
| Any TEAE                                                                                                                                                                                                   | 79 (100)                               | 372 (100)                       | 4 (100)                               | 182 (96.3)                      |
| Grade ≥3 TEAE                                                                                                                                                                                              | 59 (74.7)                              | 231 (62.1)                      | 3 (75.0)                              | 31 (16.4)                       |
| TEAE leading to discontinuation <sup>b</sup>                                                                                                                                                               | 16 (20.3)                              | 64 (17.2)                       | 0                                     | 3 (1.6)                         |
| TEAE leading to dose modification                                                                                                                                                                          | 66 (83.5)                              | 271 (72.8)                      | 1 (25.0)                              | 20 (10.6)                       |
| TEAE leading to treatment interruption                                                                                                                                                                     | 62 (78.5)                              | 248 (66.7)                      | 1 (25.0)                              | 19 (10.1)                       |
| TEAE leading to dose reduction                                                                                                                                                                             | 55 (69.6)                              | 209 (56.2)                      | 1 (25.0)                              | 8 (4.2)                         |
| TEAE, treatment-emergent adverse event.<br>Data cutoff date is December 31, 2019.<br><sup>a</sup> Dean et al. <i>Ann Oncol.</i> 2020;31(suppl 4):abst 821P.<br><sup>b</sup> Excluding disease progression. |                                        |                                 |                                       |                                 |

**Supplementary Table 8**

Most frequently occurring any grade ( $\geq 20\%$  overall) and grade  $\geq 3$  TEAEs in the overall ARIEL3 safety population and the exceptional benefit subgroup

| TEAEs, n (%)                                    | Rucaparib arm                       |                |                 |                | Placebo arm                        |                |                 |                |
|-------------------------------------------------|-------------------------------------|----------------|-----------------|----------------|------------------------------------|----------------|-----------------|----------------|
|                                                 | Exceptional benefit subgroup (n=79) |                | Overall (N=372) |                | Exceptional benefit subgroup (n=4) |                | Overall (N=189) |                |
|                                                 | Any Grade                           | Grade $\geq 3$ | Any Grade       | Grade $\geq 3$ | Any Grade                          | Grade $\geq 3$ | Any Grade       | Grade $\geq 3$ |
| At least one TEAE                               | 79 (100)                            | 59 (74.7)      | 372 (100)       | 231 (62.1)     | 4 (100)                            | 3 (75.0)       | 182 (96.3)      | 31 (16.4)      |
| Asthenia/Fatigue                                | 64 (81.0)                           | 10 (12.7)      | 267 (71.8)      | 29 (7.8)       | 4 (100)                            | 1 (25.0)       | 85 (45.0)       | 5 (2.6)        |
| Nausea                                          | 61 (77.2)                           | 4 (5.1)        | 284 (76.3)      | 14 (3.8)       | 3 (75.0)                           | 0              | 70 (37.0)       | 1 (0.5)        |
| Abdominal pain                                  | 40 (50.6)                           | 5 (6.3)        | 120 (32.3)      | 12 (3.2)       | 1 (25.0)                           | 0              | 50 (26.5)       | 1 (0.5)        |
| Anemia and/or low/decreased hemoglobin          | 36 (45.6)                           | 20 (25.3)      | 147 (39.5)      | 83 (22.3)      | 0                                  | 0              | 9 (4.8)         | 1 (0.5)        |
| Constipation                                    | 34 (43.0)                           | 2 (2.5)        | 140 (37.6)      | 7 (1.9)        | 2 (50.0)                           | 0              | 44 (23.3)       | 2 (1.1)        |
| ALT/AST Increased                               | 34 (43.0)                           | 13 (16.5)      | 133 (35.8)      | 39 (10.5)      | 0                                  | 0              | 6 (3.2)         | 0              |
| Diarrhea                                        | 34 (43.0)                           | 1 (1.3)        | 129 (34.7)      | 3 (0.8)        | 2 (50.0)                           | 0              | 43 (22.8)       | 2 (1.1)        |
| Thrombocytopenia and/or low/decreased platelets | 31 (39.2)                           | 3 (3.8)        | 111 (29.8)      | 21 (5.6)       | 0                                  | 0              | 5 (2.6)         | 0              |
| Decreased appetite                              | 27 (34.2)                           | 1 (1.3)        | 94 (25.3)       | 3 (0.8)        | 0                                  | 0              | 25 (13.2)       | 0              |
| Vomiting                                        | 26 (32.9)                           | 4 (5.1)        | 139 (37.4)      | 16 (4.3)       | 0                                  | 0              | 29 (15.3)       | 2 (1.1)        |
| Dysgeusia                                       | 25 (31.6)                           | 0              | 148 (39.8)      | 0              | 0                                  | 0              | 13 (6.9)        | 0              |
| Neutropenia and/or low/decreased ANC            | 24 (30.4)                           | 10 (12.7)      | 76 (20.4)       | 32 (8.6)       | 1 (25.0)                           | 0              | 9 (4.8)         | 2 (1.1)        |

ANC, absolute neutrophil count; ALT, alanine aminotransferase; AST, aspartate aminotransferase; TEAE, treatment-emergent adverse event.  
Visit cutoff date is December 31, 2019. Data are sorted by decreasing incidence in the rucaparib exceptional benefit subgroup. There were no TEAEs of myelodysplastic syndrome or acute myeloid leukemia reported.



**Supplementary Table 9**

Incidence of myelodysplastic syndrome/acute myeloid leukemia in the ARIEL3 patient population

| MDS/AML, n (%)               | Rucaparib arm |                          |                | Placebo arm |                          |                |
|------------------------------|---------------|--------------------------|----------------|-------------|--------------------------|----------------|
|                              | All           | BRCA mutant <sup>a</sup> | BRCA wild-type | All         | BRCA mutant <sup>a</sup> | BRCA wild-type |
| Overall                      | 14/375 (3.7)  | 9/130 (6.9)              | 5/245 (2.0)    | 4/189 (2.1) | 3/66 (4.5)               | 1/123 (0.8)    |
| Exceptional benefit subgroup | 9/79 (11.4)   | 7/46 (15.2)              | 2/33 (6.1)     | 0/4 (0)     | 0/3 (0)                  | 0/1 (0)        |
| All others                   | 5/296 (1.7)   | 2/84 (2.4)               | 3/212 (1.4)    | 4/185 (2.2) | 3/63 (4.8)               | 1/122 (0.8)    |

AML, acute myeloid leukemia; BRCA, *BRCA1* or *BRCA2*; MDS, myelodysplastic syndrome.  
 Visit cutoff date is December 19, 2020.  
<sup>a</sup> Includes germline and somatic mutations.

## Supplementary Figures

**Supplementary Fig. 1.** Analysis of PFS-PPFI differences in exceptional benefit patients. (A) A schematic showing simplified typical patient clinical history in ARIEL3 and the events that define the PPFI and PFS lengths. (B) Histogram showing the distributions of PFS-PPFI differences in ARIEL3 exceptional benefit patients. PD, progressive disease; PFS, progression-free survival; PPFI, penultimate platinum-free interval.

A

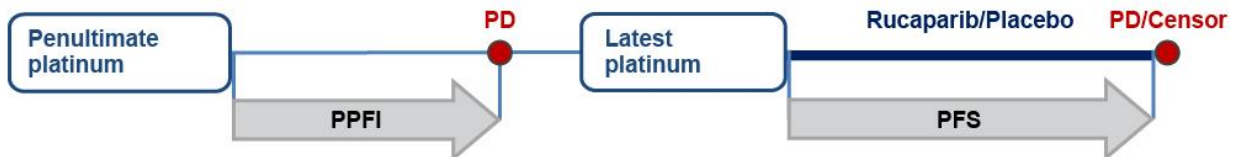

B

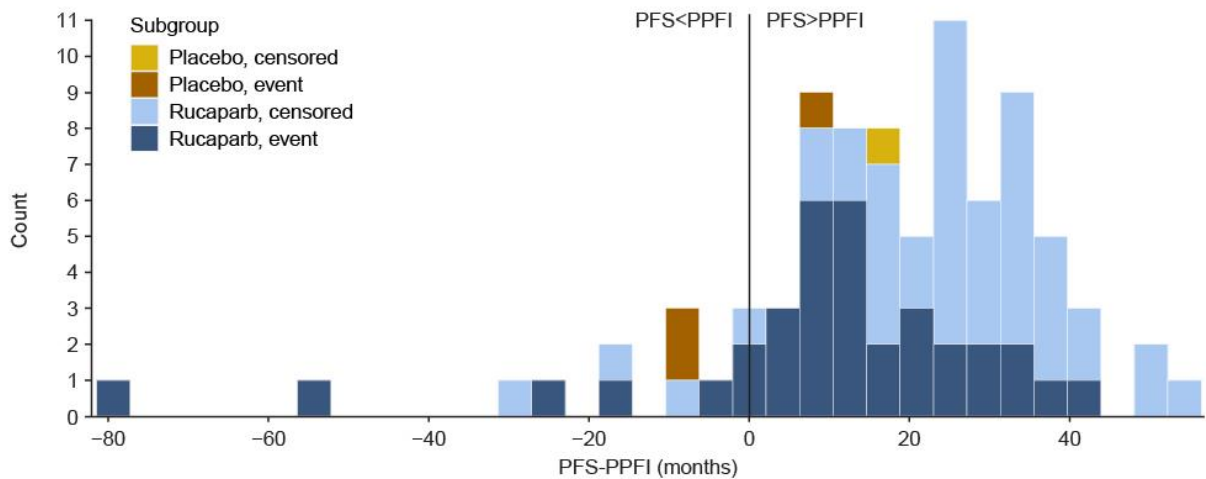

**Supplementary Fig. 2.** Frequencies of outcomes in placebo-arm patients with different baseline clinical and molecular characteristics. *p* values based on chi-square tests; bold denotes significant results ( $p < 0.05$ ). BRCA, *BRCA1* or *BRCA2*; HRR, homologous recombination repair; LOH, loss of heterozygosity; PPI, penultimate platinum-free interval.

| Subgroup                                                         | Exceptional benefit | Short term | All others | <i>p</i> value |
|------------------------------------------------------------------|---------------------|------------|------------|----------------|
| <b>Number of prior lines of chemotherapy</b>                     |                     |            |            | 0.8112         |
| 2 (n=124)                                                        | 2.4%                | 31.5%      | 66.1%      |                |
| 3+ (n=65)                                                        | 1.5%                | 35.4%      | 63.1%      |                |
| <b>Number of prior lines of platinum</b>                         |                     |            |            | 0.8648         |
| 2 (n=126)                                                        | 2.4%                | 31.7%      | 65.9%      |                |
| 3+ (n=63)                                                        | 1.6%                | 34.9%      | 63.5%      |                |
| <b>Measurable disease</b>                                        |                     |            |            | 0.0568         |
| No (n=123)                                                       | 2.4%                | 26.8%      | 70.7%      |                |
| Yes (n=66)                                                       | 1.5%                | 43.9%      | 54.5%      |                |
| <b>Response to most recent platinum</b>                          |                     |            |            | <b>0.0037</b>  |
| Complete response (n=64)                                         | 1.6%                | 17.2%      | 81.3%      |                |
| Partial response (n=125)                                         | 2.4%                | 40.8%      | 56.8%      |                |
| <b>PPI</b>                                                       |                     |            |            | <b>0.0145</b>  |
| >12 months (n=113)                                               | 3.5%                | 25.7%      | 70.8%      |                |
| 6–12 months (n=76)                                               | 0.0%                | 43.4%      | 56.6%      |                |
| <b>Molecular subgroup</b>                                        |                     |            |            | 0.5863         |
| BRCA mutant (n=75)                                               | 4.0%                | 34.7%      | 61.3%      |                |
| BRCA wild-type/LOH high (n=45)                                   | 0.0%                | 31.1%      | 68.9%      |                |
| BRCA wild-type/LOH low (n=53)                                    | 1.9%                | 28.3%      | 69.8%      |                |
| <b>Non-BRCA HRR gene mutations</b>                               |                     |            |            | 0.5929         |
| <i>RAD51C</i> , <i>RAD51D</i> (n=3)                              | 0.0%                | 0.0%       | 100.0%     |                |
| Other (n=11)                                                     | 0.0%                | 18.2%      | 81.8%      |                |
| No HRR gene mutations (n=100)                                    | 1.0%                | 34.0%      | 65.0%      |                |
| <b>Archival <i>BRCA1</i> methylation in BRCA wild-type cases</b> |                     |            |            | 0.7815         |
| High (n=16)                                                      | 0.0%                | 31.3%      | 68.8%      |                |
| Low (n=8)                                                        | 0.0%                | 12.5%      | 87.5%      |                |
| Unmethylated (n=71)                                              | 1.4%                | 32.4%      | 66.2%      |                |

**Supplementary Fig. 3.** Genetic and epigenetic alterations in exceptional benefit (left) and short-term (right) subgroup patients in the placebo arm. BL, baseline; BR, best response; BRCA, *BRCA1* or *BRCA2*; CT, chemotherapy; HRD, homologous recombination deficiency; HRR, homologous recombination repair; LOH, loss of heterozygosity; plt, platinum; PFI, penultimate platinum-free interval.

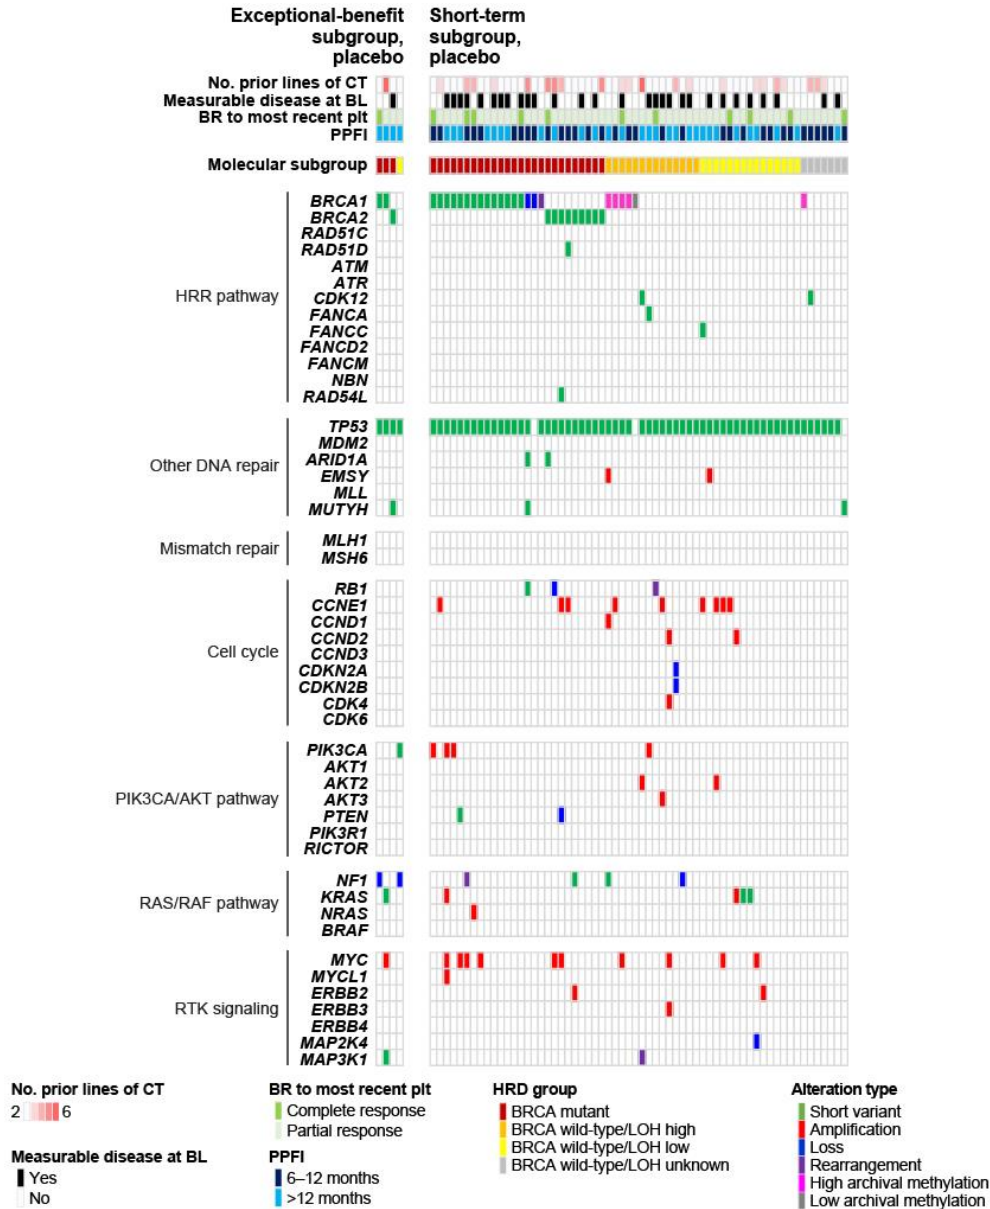

**Highlights (3–5 bullets; 125 characters max each [incl. spaces]):**

- Clinical/molecular characteristics associated with exceptional benefit from rucaparib maintenance in ARIEL3 were explored.
- 21% of patients in the rucaparib arm derived exceptional benefit (PFS  $\geq$ 2 years) compared with only 2% in the placebo arm.
- Clinical characteristics associated with exceptional outcomes on rucaparib were related to platinum sensitivity.
- *BRCA1*, *BRCA2*, *RAD51C*, and *RAD51D* mutations were associated with exceptional benefit from rucaparib.
- A diverse set of patients with high-grade ovarian carcinoma can derive exceptional benefit from rucaparib maintenance.
